# Supplementary material for: Effects of Gut Microbiome Modulation on Reducing Adverse Health Outcomes among Elderly and Diabetes Patients during the COVID-19 Pandemic: A Randomised, Double-Blind, Placebo-Controlled Trial (IMPACT Study)
Source: MDPI journal article supplement (doi:10.3390/nu15081982), 2023-04-20
Supplement: s1 [file s1]

Table S1. Grouping of pathogenic bacteria according to the faecal metagenomic analysis of microbial profile

| Species                                     | Group                   | Publication                                       |
|---------------------------------------------|-------------------------|---------------------------------------------------|
| <i>s__Bifidobacterium_adolescentis</i>      | Covid_Negative_Cor      | Yeoh Y K, et al.<br>Gut, 2021, 70(4):<br>698-706. |
| <i>s__Bifidobacterium_pseudocatenulatum</i> | Covid_Negative_Cor      |                                                   |
| <i>s__Collinsella_aerofaciens</i>           | Covid_Negative_Cor      |                                                   |
| <i>s__Bacteroides_caccae</i>                | Covid_Positive_Cor      |                                                   |
| <i>s__Bacteroides_dorei</i>                 | Covid_Positive_Cor      |                                                   |
| <i>s__Bacteroides_ovatus</i>                | Covid_Positive_Cor      |                                                   |
| <i>s__Bacteroides_vulgatus</i>              | Covid_Positive_Cor      |                                                   |
| <i>s__Blautia_obeum</i>                     | Covid_Negative_Cor      |                                                   |
| <i>s__Ruminococcus_gnavus</i>               | Covid_Positive_Cor      |                                                   |
| <i>s__Ruminococcus_torques</i>              | Covid_Positive_Cor      |                                                   |
| <i>s__Coprococcus_comes</i>                 | Covid_Negative_Cor      |                                                   |
| <i>s__Dorea_formicigenerans</i>             | Covid_Negative_Cor      |                                                   |
| <i>s__Dorea_longicatena</i>                 | Covid_Negative_Cor      |                                                   |
| <i>s__Eubacterium_rectale</i>               | Covid_Negative_Cor      |                                                   |
| <i>s__Faecalibacterium_prausnitzii</i>      | Covid_Negative_Cor      |                                                   |
| <i>s__Ruminococcus_bromii</i>               | Covid_Negative_Cor      |                                                   |
| <i>s__Ruminococcus_obeum_CAG_39</i>         | Covid_Negative_Cor      |                                                   |
| <i>s__Akkermansia_muciniphila</i>           | Covid_Positive_Cor      | Su Q, Lau R I,<br>Liu Q, et al.. Gut,<br>2022.    |
| <i>s__Bacteroides_fragilis</i>              | Long_covid_Positive_Cor |                                                   |
| <i>s__Bacteroides_salysiae</i>              | Long_covid_Positive_Cor |                                                   |
| <i>s__Blautia_hansenii</i>                  | Long_covid_Positive_Cor |                                                   |
| <i>s__Blautia_sp_CAG_257</i>                | Long_covid_Positive_Cor |                                                   |
| <i>s__Ruminococcus_gnavus</i>               | Long_covid_Positive_Cor |                                                   |
| <i>s__Clostridium_bolteae</i>               | Long_covid_Positive_Cor |                                                   |
| <i>s__Coprobacillus_cateniformis</i>        | Long_covid_Positive_Cor |                                                   |
| <i>s__Erysipelatoclostridium_amosum</i>     | Long_covid_Positive_Cor |                                                   |
| <i>s__Parasutterella_excrementihominis</i>  | Long_covid_Positive_Cor |                                                   |
| <i>s__Sutterella_parvirubra</i>             | Long_covid_Positive_Cor |                                                   |
| <i>s__Bifidobacterium_adolescentis</i>      | Long_covid_Negative_Cor |                                                   |
| <i>s__Bifidobacterium_pseudocatenulatum</i> | Long_covid_Negative_Cor |                                                   |
| <i>s__Bacteroides_dorei</i>                 | Long_covid_Negative_Cor |                                                   |
| <i>s__Eubacterium_hallii</i>                | Long_covid_Negative_Cor |                                                   |
| <i>s__Blautia_obeum</i>                     | Long_covid_Negative_Cor |                                                   |
| <i>s__Blautia_wexlerae</i>                  | Long_covid_Negative_Cor |                                                   |
| <i>s__Roseburia_hominis</i>                 | Long_covid_Negative_Cor |                                                   |
| <i>s__Gemmiger_formicilis</i>               | Long_covid_Negative_Cor |                                                   |
| <i>s__Firmicutes_bacterium_CAG_83</i>       | Long_covid_Negative_Cor |                                                   |
| <i>s__Megamonas_funiformis</i>              | Long_covid_Negative_Cor |                                                   |

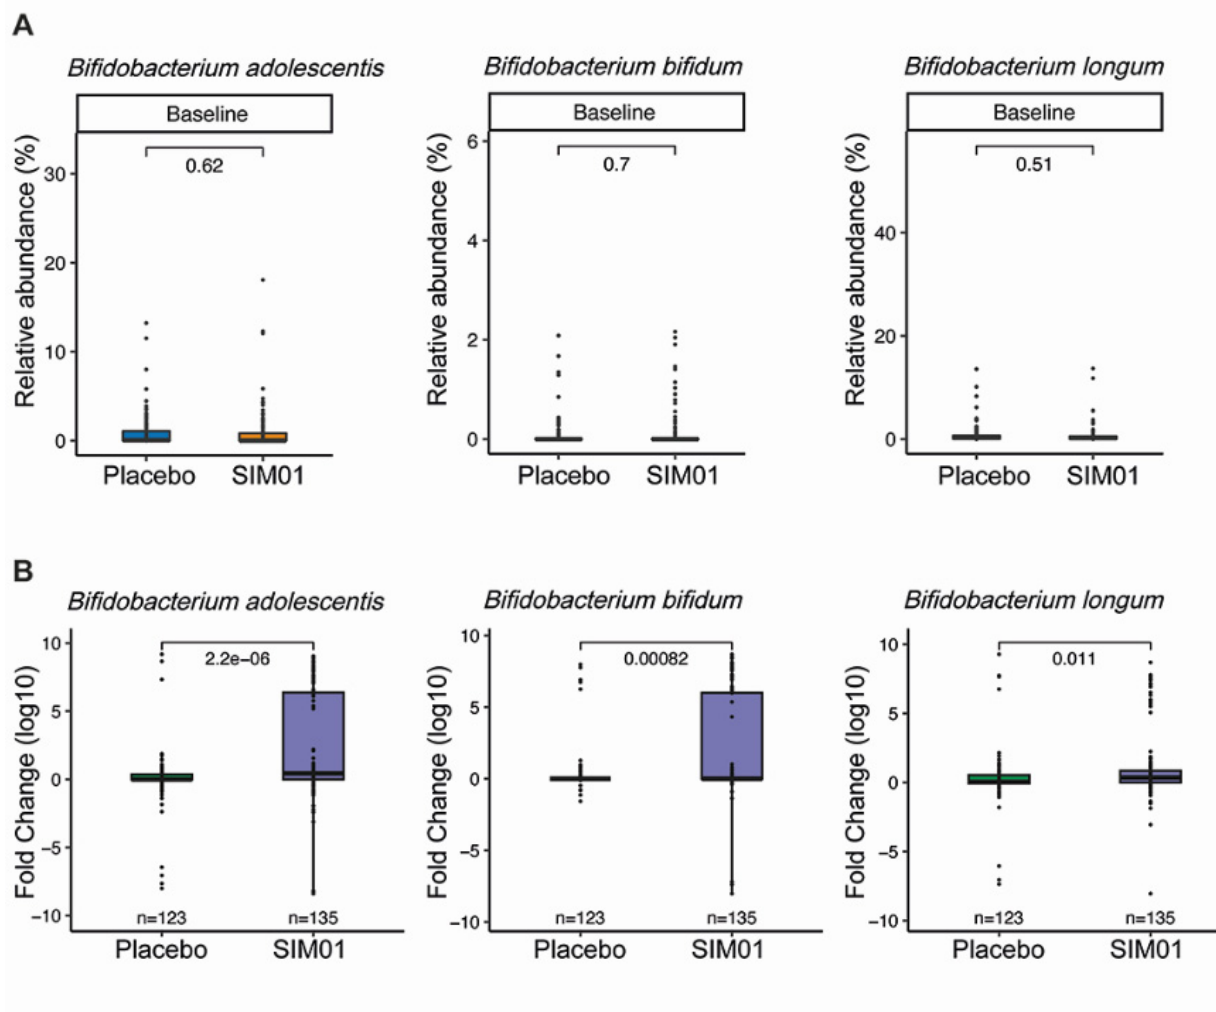

Supplementary Figure S1. (A) There is no difference in the relative abundance of three species (*Bifidobacterium adolescentis*, *Bifidobacterium bifidum*, and *Bifidobacterium longum*) contained in SIM01 between the placebo and SIM01 groups at baseline. (B) Oral SIM01 treatment significant increase in the fold change (month 3/baseline) of three probiotic species contained in SIM01 compared with the placebo arm. *p* values were given by the Wilcoxon rank-sum test (two-sided). Elements on boxplots: centre line, median; box limits, upper and lower quartiles; points, each sample.
